# Supplementary material for: CNVind: an open source cloud-based pipeline for rare CNVs detection in whole exome sequencing data based on the depth of coverage
Source: Springer Nature journal article supplement (doi:10.1186/s12859-022-04617-x), 2022-03-05
Supplement: 12859_2022_4617_MOESM1_ESM.pdf [file 12859_2022_4617_MOESM1_ESM.pdf]

# **CNVind - An open source cloud-based pipeline for rare CNVs detection in whole exome sequencing data based on the depth of coverage**

**Wiktor Kuśmirek, Robert Nowak**

Supplementary Materials

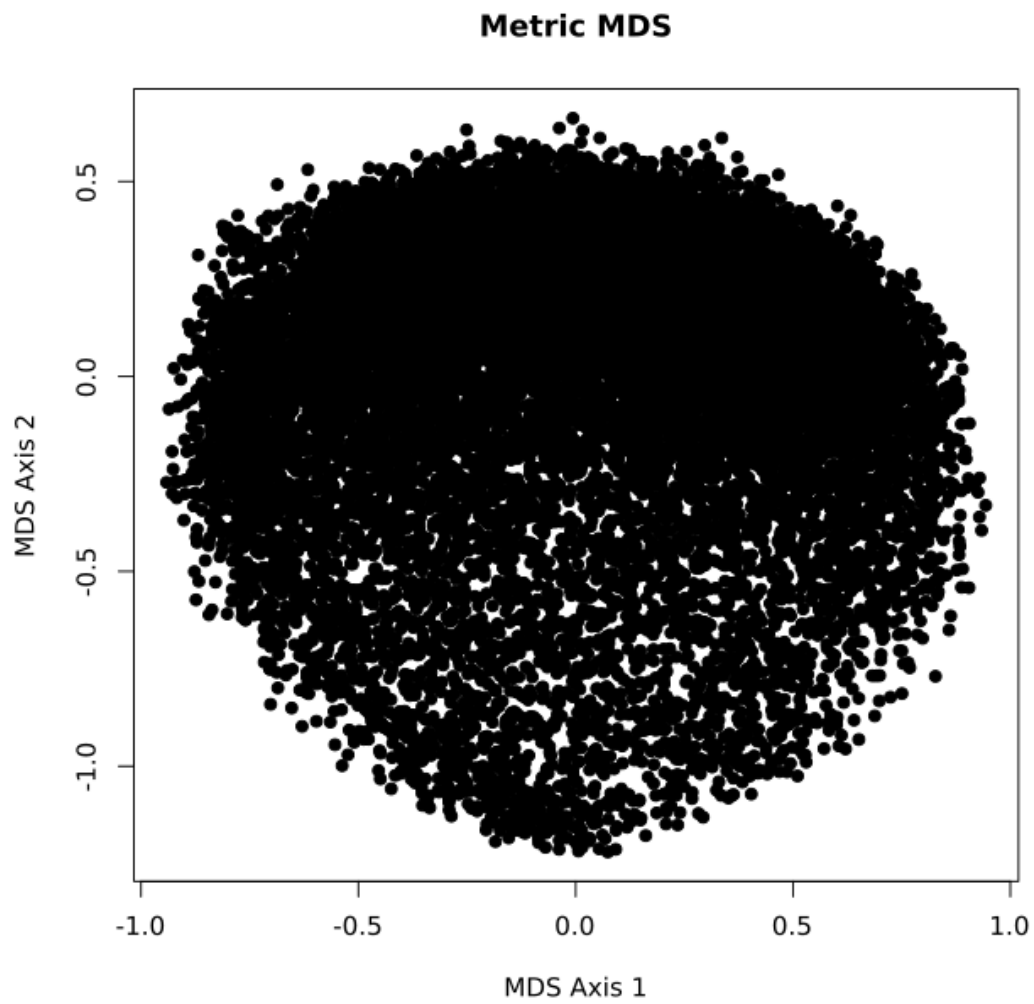

Figure S1: Correlation between depth of coverage in sequencing regions of benchmark dataset (chromosome 1).

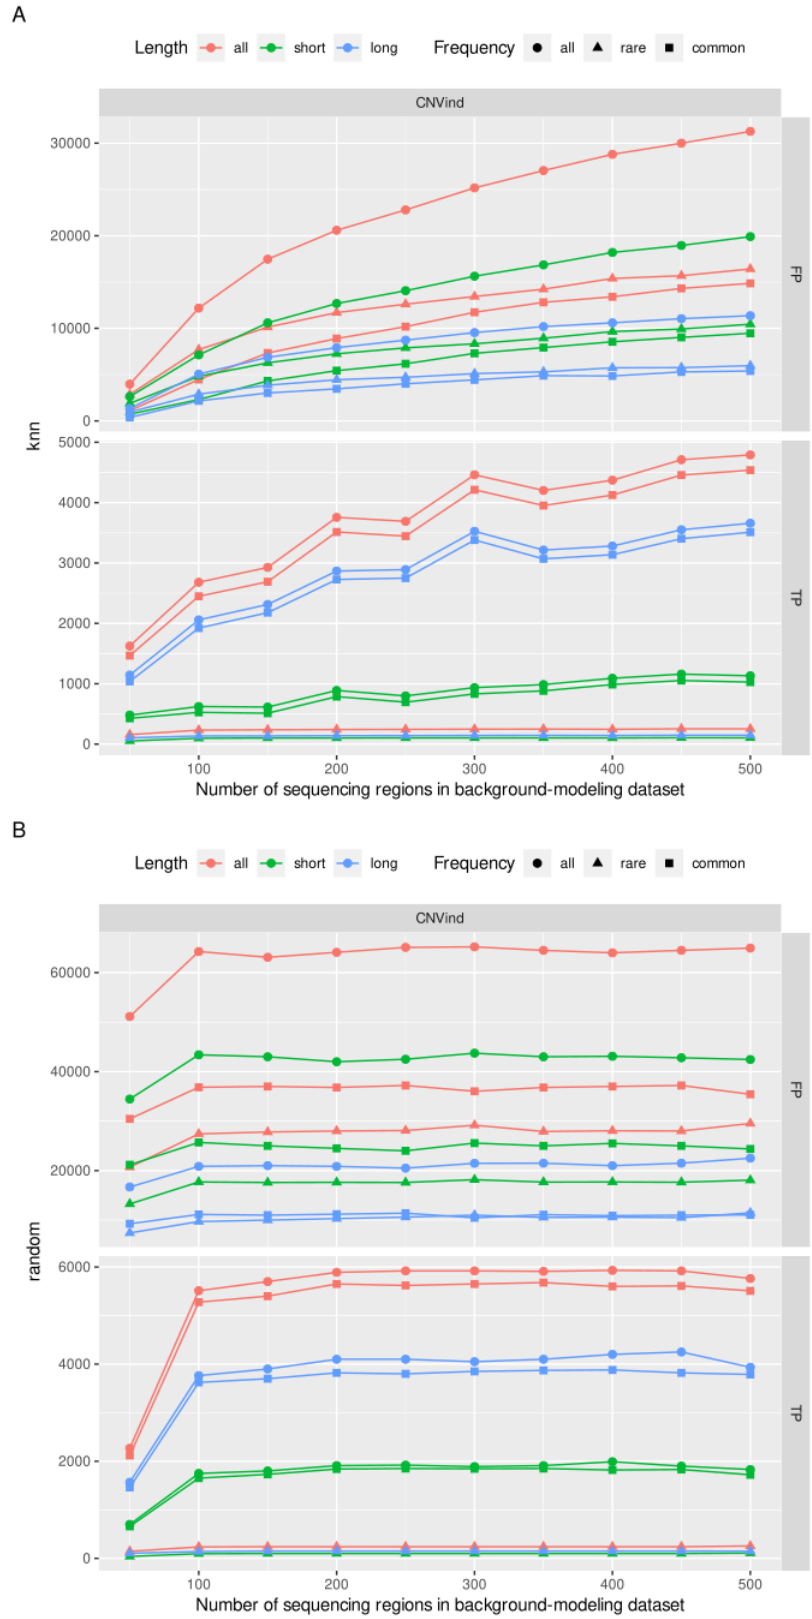

Figure S2: Effect of the size of the set of sequencing regions which models background on the number of CNVs detected by the CNVind tool (chromosome 1).

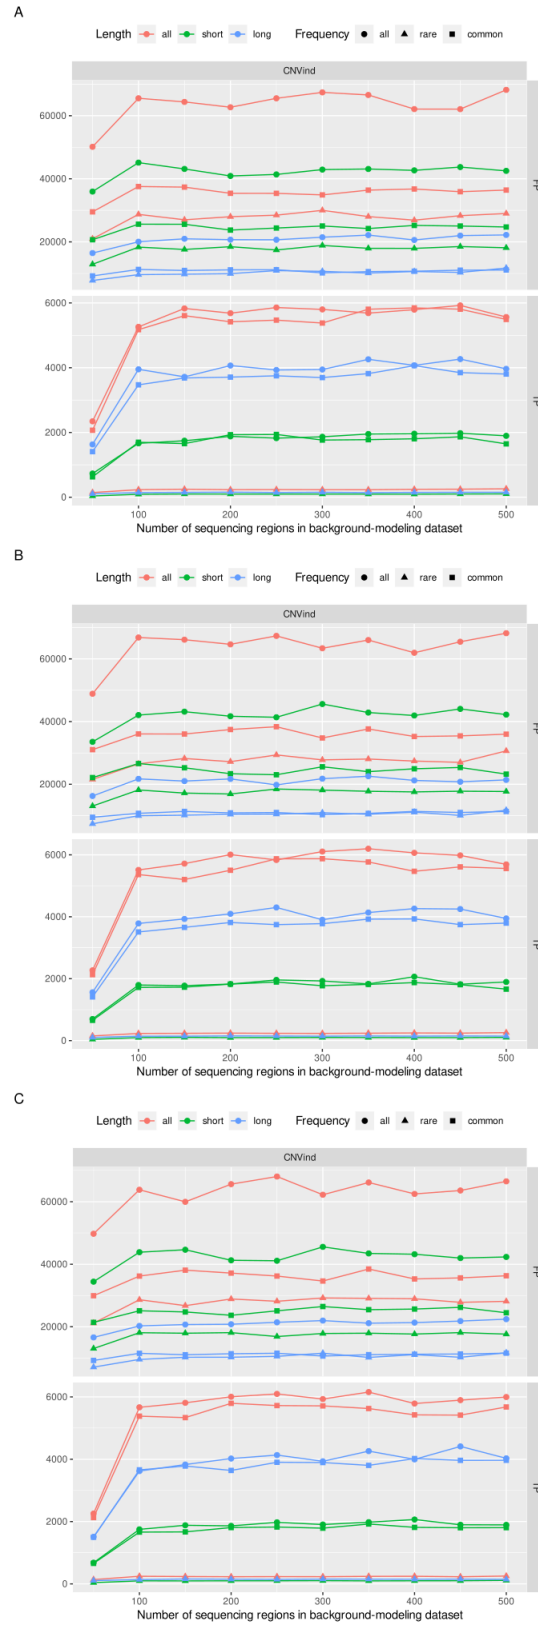

Figure S3: Effect of using other metrics when selecting the  $k$  most similar sequencing regions: (A) GC content, (B) sequencing region length, (C) mean depth of coverage in the sequencing region (chromosome 1).

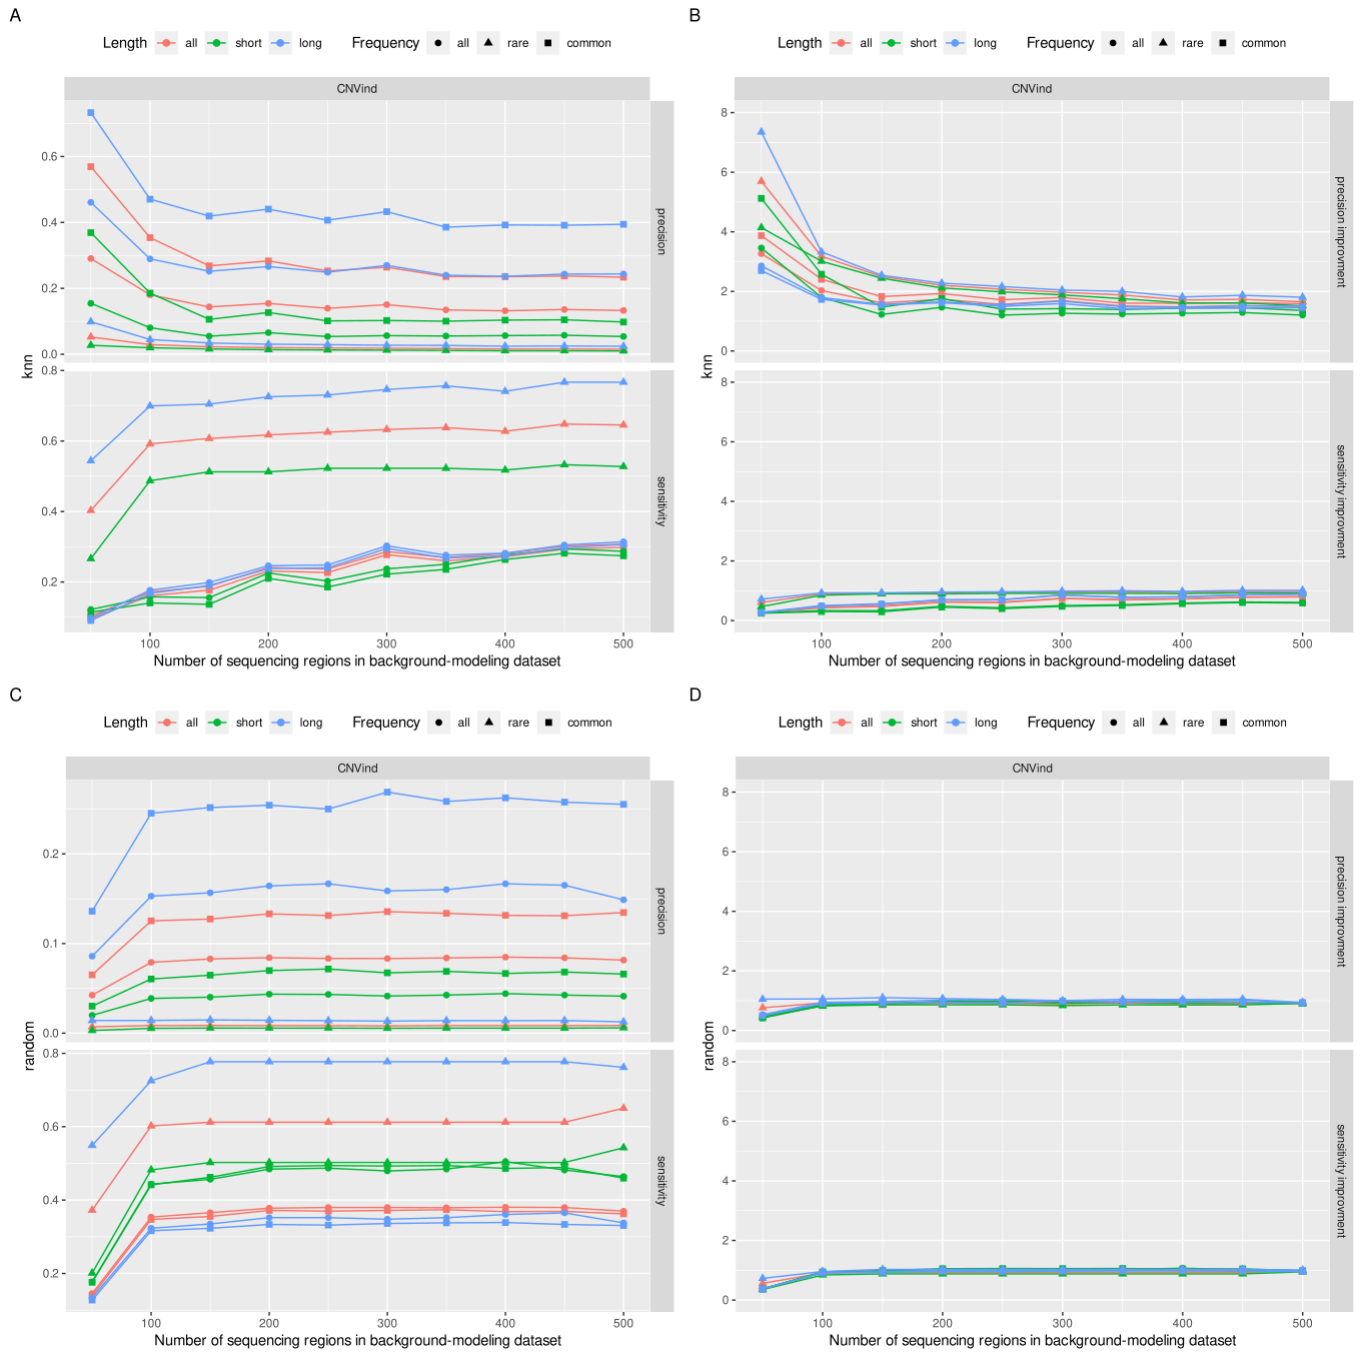

Figure S4: Effect of the size of the set of sequencing regions which models background on the results' sensitivity and precision. (chromosome 1).

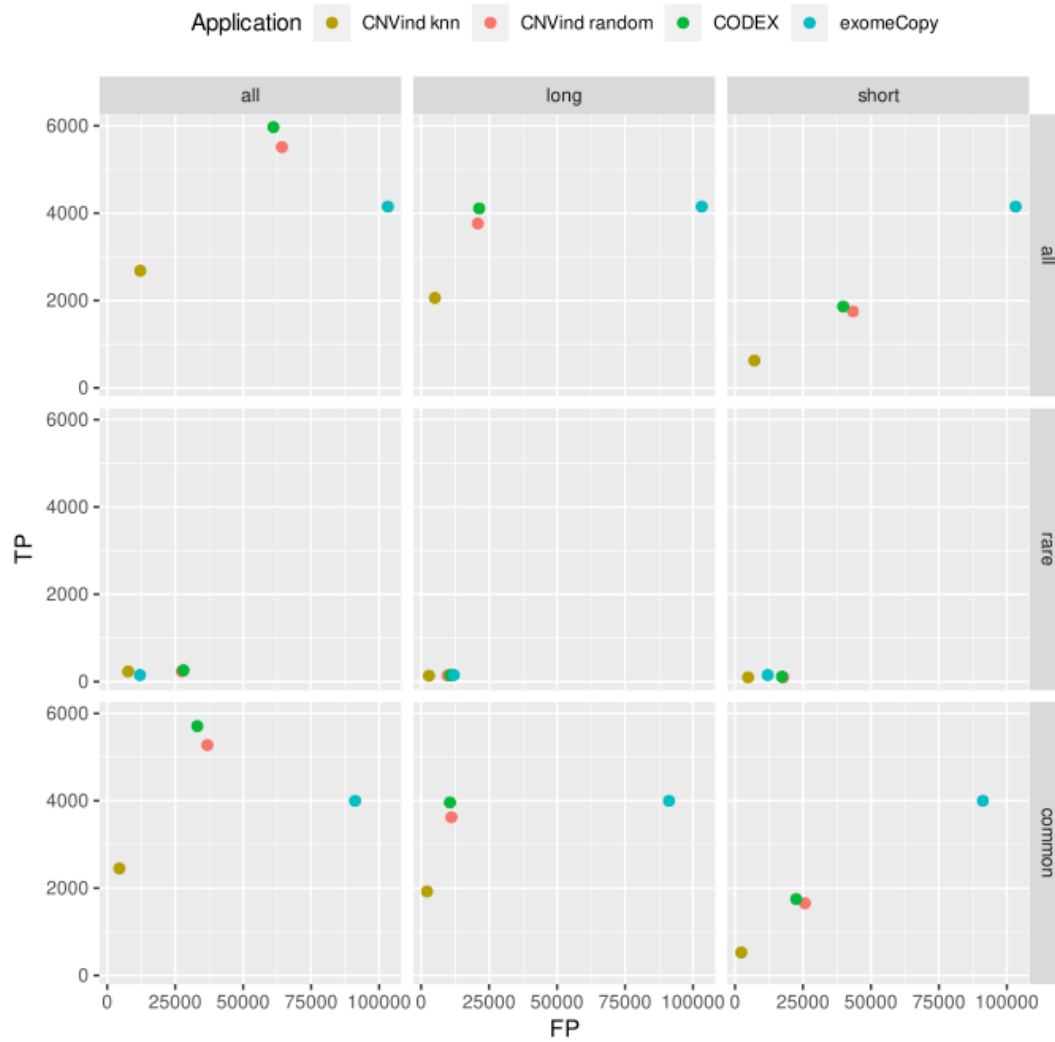

Figure S5: Comparison of the results obtained by the CODEX, exomeCopy, and CNVind applications in knn and random modes (chromosome 1).

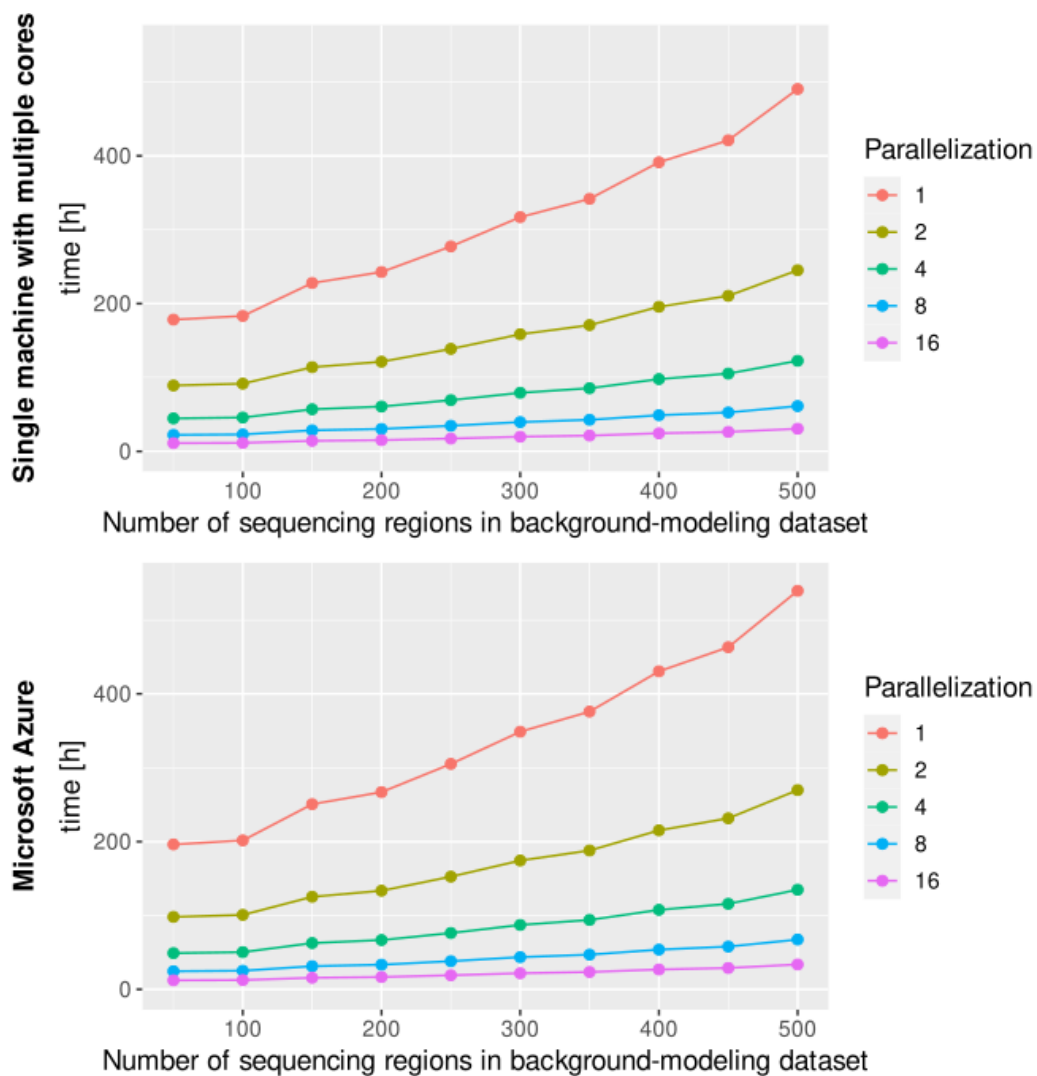

Figure S6: Comparison of the depth of coverage normalization computation times for the CNVind application on a single machine with multiple cores and in Microsoft Azure cloud (chromosome 1).
